# Supplementary material for: The Dynamic Distribution of Porcine Microbiota across Different Ages and Gastrointestinal Tract Segments
Source: PubMed Central journal article supplement (PMC4331431; doi:10.1371/journal.pone.0117441), 2015-02-17

a

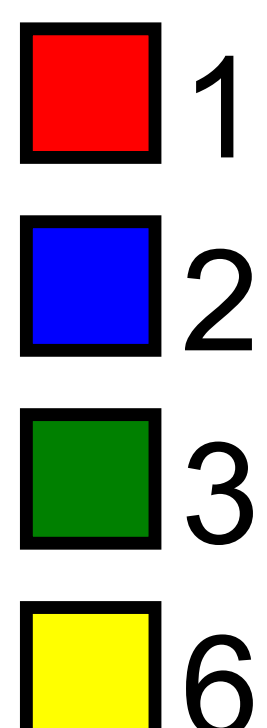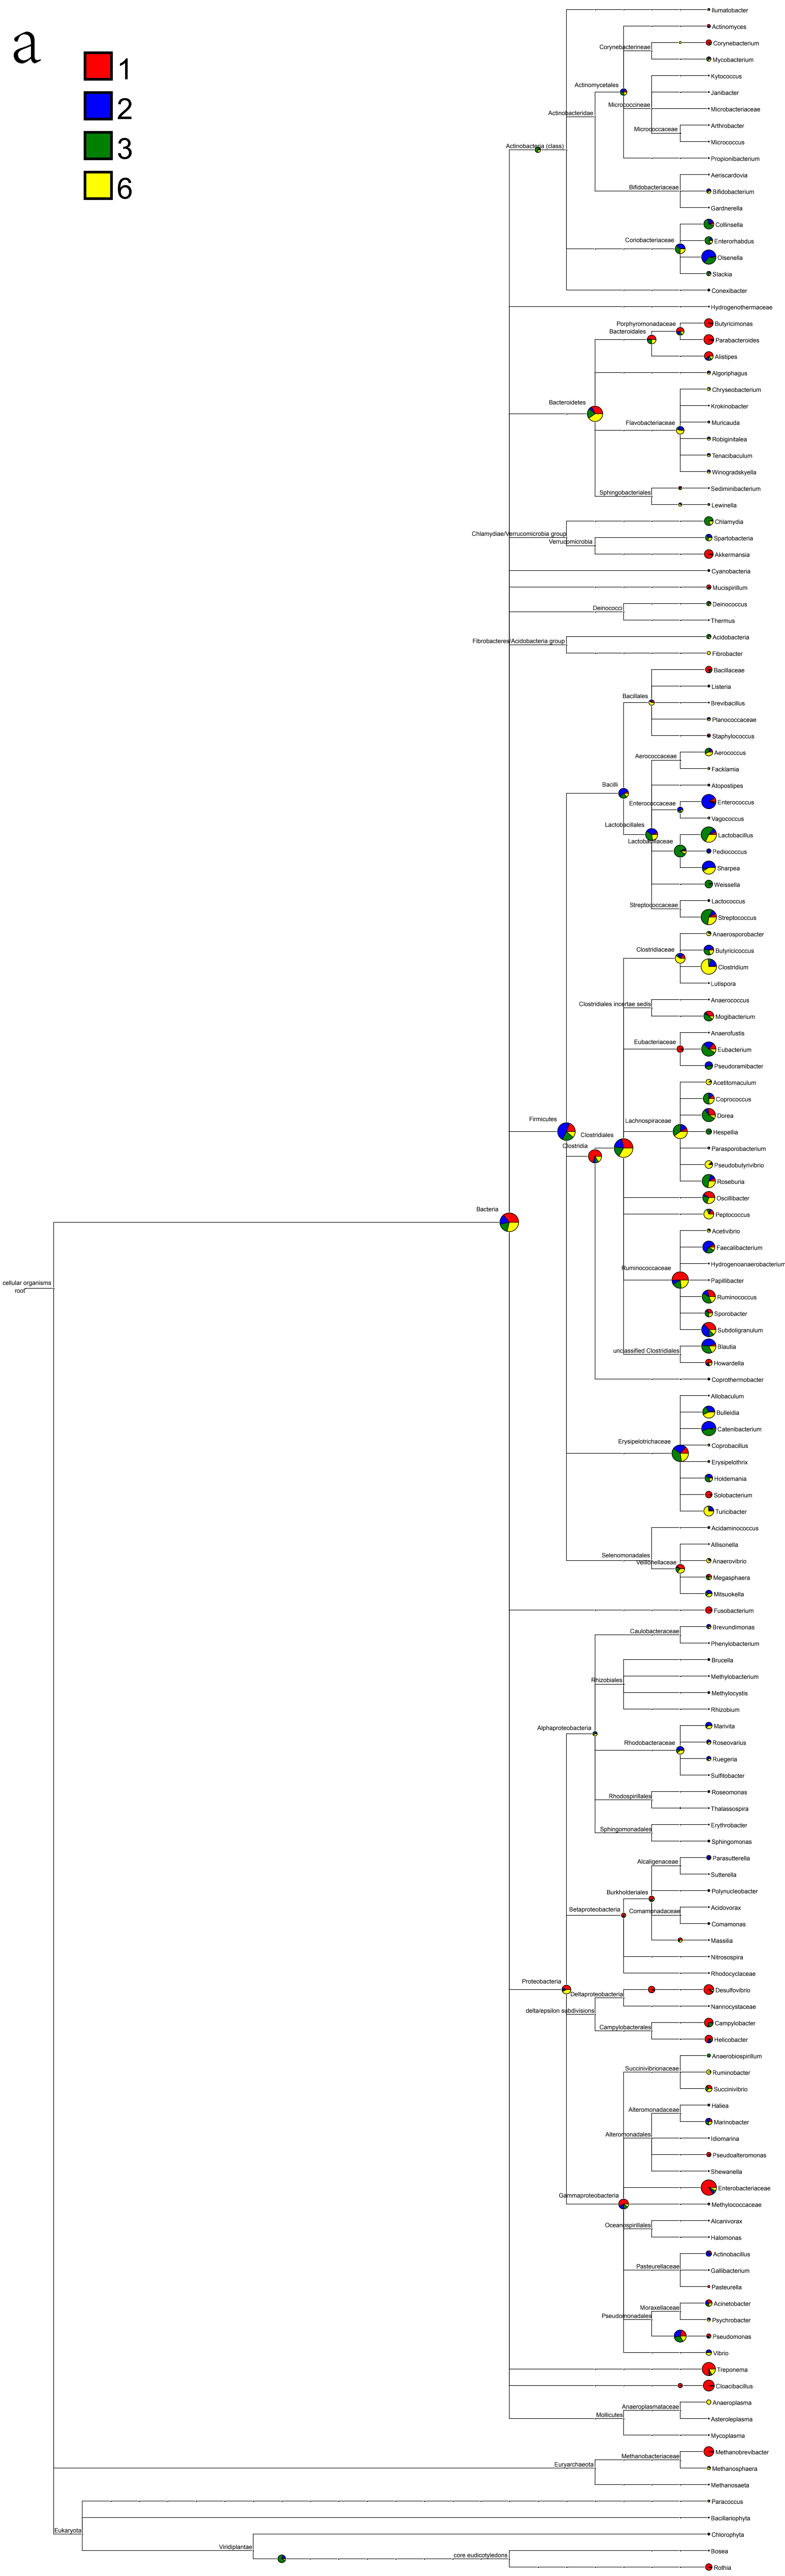

b

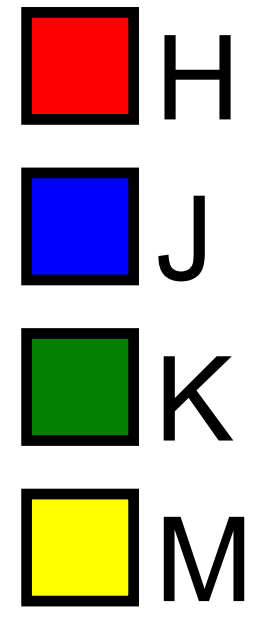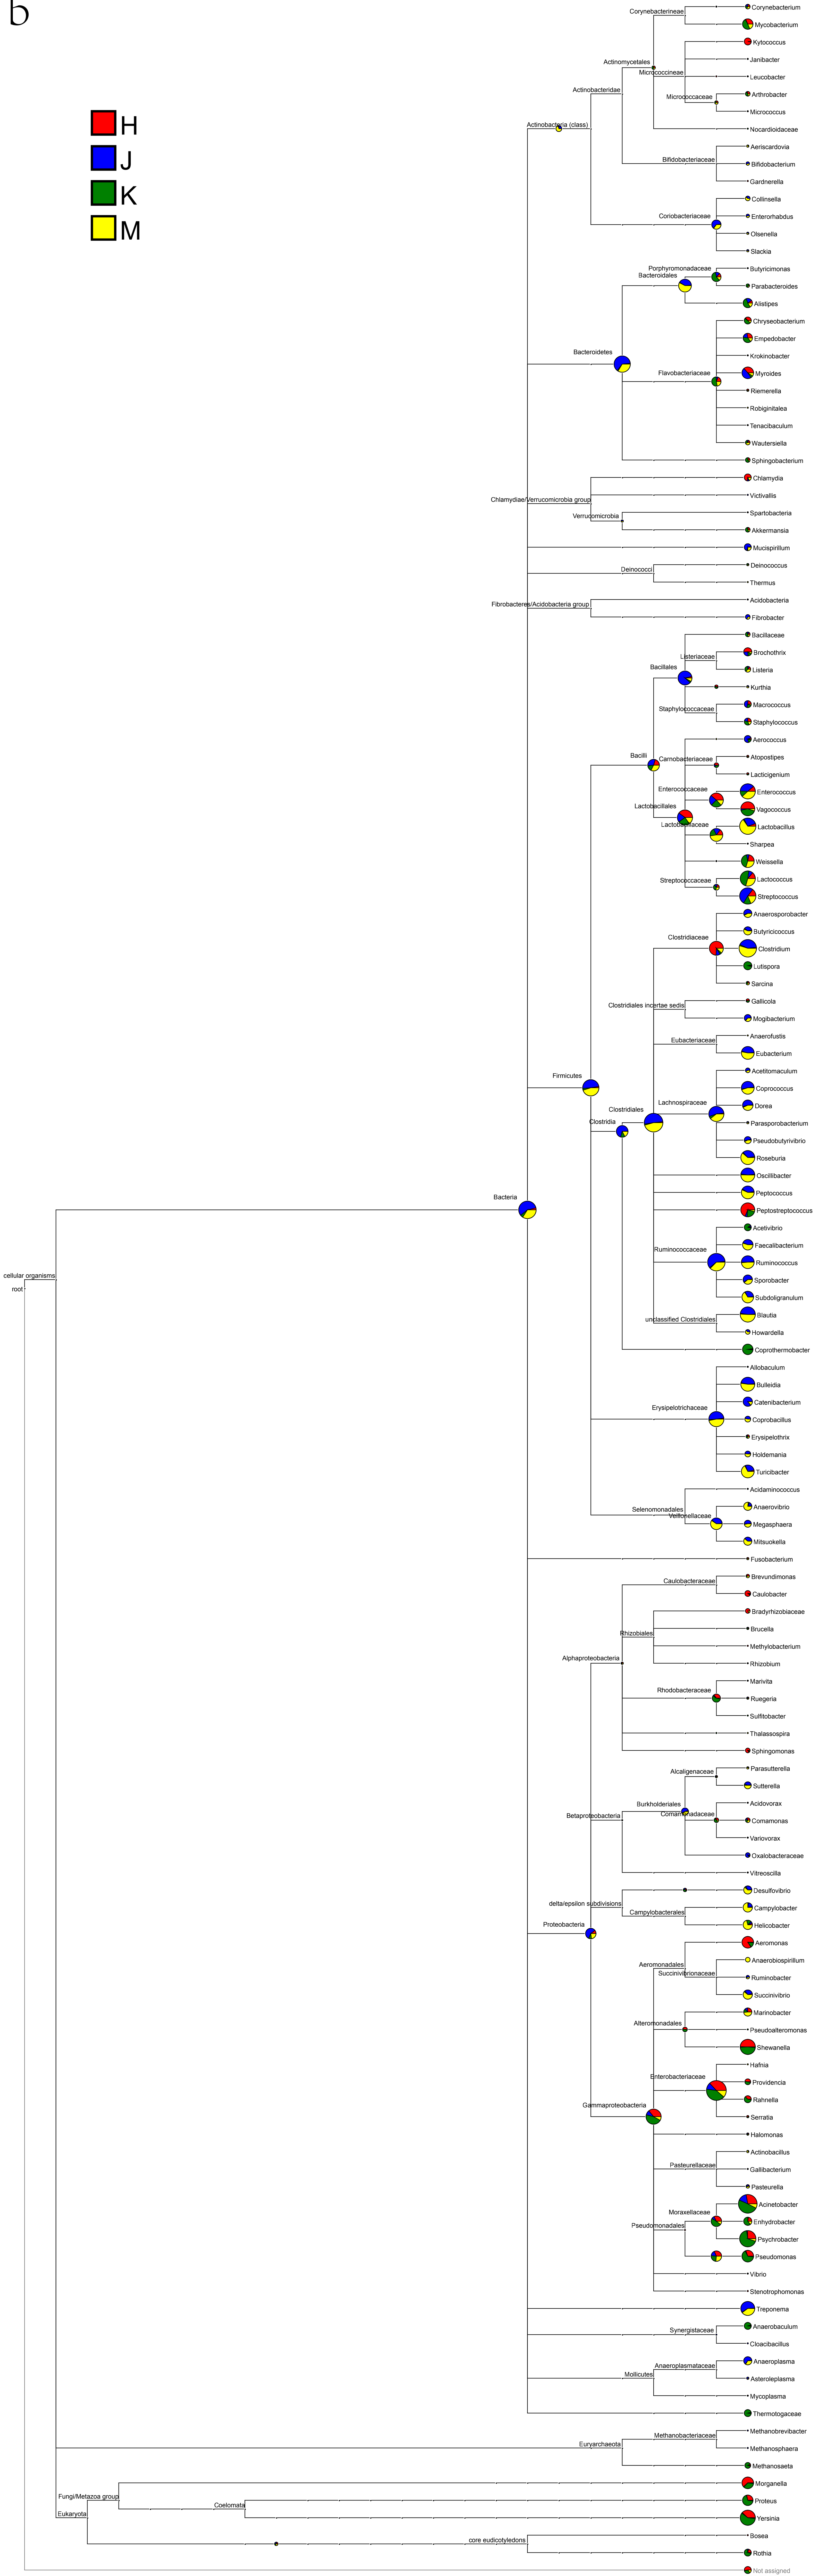

Supplement: pone.0117441.s002.pdf [file pone.0117441.s002.pdf]
