# Supplementary material for: The Dynamic Distribution of Porcine Microbiota across Different Ages and Gastrointestinal Tract Segments
Source: PLoS One. 2015 Feb 17;10(2):e0117441. doi: 10.1371/journal.pone.0117441 (PMC4331431; doi:10.1371/journal.pone.0117441)
Supplement: S5 Table — (XLSX) [file pone.0117441.s007.xlsx]

## Sheet: Sheet1
Mutiple comparison in different intestinal segments and feces(LSD)
Genus	position 1	position 2	Sig.
Acetitomaculum	feces	ileum	0.00691813
		colon	0.0791995
		jejunum	0.00367016
		cecum	0.00698517
	ileum	feces	0.00691813
		colon	0.278286
		jejunum	0.953463
		cecum	0.783969
	colon	feces	0.0791995
		ileum	0.278286
		jejunum	0.26528
		cecum	0.439647
	jejunum	feces	0.00367016
		ileum	0.953463
		colon	0.26528
		cecum	0.819703
	cecum	feces	0.00698517
		ileum	0.783969
		colon	0.439647
		jejunum	0.819703
Acetivibrio	feces	ileum	0.804163
		colon	0.758268
		jejunum	0.780537
		cecum	0.570829
	ileum	feces	0.804163
		colon	0.546973
		jejunum	0.56976
		cecum	0.880174
	colon	feces	0.758268
		ileum	0.546973
		jejunum	0.992723
		cecum	0.298907
	jejunum	feces	0.780537
		ileum	0.56976
		colon	0.992723
		cecum	0.334425
	cecum	feces	0.570829
		ileum	0.880174
		colon	0.298907
		jejunum	0.334425
Acidaminococcus	feces	ileum	0.842036
		colon	0.934136
		jejunum	0.780537
		cecum	0.806834
	ileum	feces	0.842036
		colon	0.905576
		jejunum	0.967721
		cecum	0.639311
	colon	feces	0.934136
		ileum	0.905576
		jejunum	0.858669
		cecum	0.719341
	jejunum	feces	0.780537
		ileum	0.967721
		colon	0.858669
		cecum	0.538876
	cecum	feces	0.806834
		ileum	0.639311
		colon	0.719341
		jejunum	0.538876
Acidovorax	feces	ileum	0.26528
		colon	0.602174
		jejunum	0.954369
		cecum	0.809102
	ileum	feces	0.26528
		colon	0.0800796
		jejunum	0.329482
		cecum	0.442427
	colon	feces	0.602174
		ileum	0.0800796
		jejunum	0.552055
		cecum	0.375359
	jejunum	feces	0.954369
		ileum	0.329482
		colon	0.552055
		cecum	0.870297
	cecum	feces	0.809102
		ileum	0.442427
		colon	0.375359
		jejunum	0.870297
Acinetobacter	feces	ileum	1.49998e-07
		colon	7.07119e-05
		jejunum	1.98485e-09
		cecum	0.000146197
	ileum	feces	1.49998e-07
		colon	0.00420881
		jejunum	0.378486
		cecum	0.00227202
	colon	feces	7.07119e-05
		ileum	0.00420881
		jejunum	3.85805e-05
		cecum	0.873508
	jejunum	feces	1.98485e-09
		ileum	0.378486
		colon	3.85805e-05
		cecum	1.95407e-05
	cecum	feces	0.000146197
		ileum	0.00227202
		colon	0.873508
		jejunum	1.95407e-05
Actinobacillus	feces	ileum	0.34057
		colon	0.918587
		jejunum	0.387983
		cecum	0.391012
	ileum	feces	0.34057
		colon	0.428069
		jejunum	0.910521
		cecum	0.0573512
	colon	feces	0.918587
		ileum	0.428069
		jejunum	0.478994
		cecum	0.290616
	jejunum	feces	0.387983
		ileum	0.910521
		colon	0.478994
		cecum	0.0521487
	cecum	feces	0.391012
		ileum	0.0573512
		colon	0.290616
		jejunum	0.0521487
Actinomyces	feces	ileum	0.809102
		colon	0.880174
		jejunum	0.85497
		cecum	0.631558
	ileum	feces	0.809102
		colon	0.920701
		jejunum	0.953326
		cecum	0.453172
	colon	feces	0.880174
		ileum	0.920701
		jejunum	0.965938
		cecum	0.472562
	jejunum	feces	0.85497
		ileum	0.953326
		colon	0.965938
		cecum	0.45705
	cecum	feces	0.631558
		ileum	0.453172
		colon	0.472562
		jejunum	0.45705
Aeriscardovia	feces	ileum	0.940493
		colon	0.965938
		jejunum	0.290707
		cecum	0.365385
	ileum	feces	0.940493
		colon	0.963426
		jejunum	0.458829
		cecum	0.536577
	colon	feces	0.965938
		ileum	0.963426
		jejunum	0.326484
		cecum	0.401777
	jejunum	feces	0.290707
		ileum	0.458829
		colon	0.326484
		cecum	0.918587
	cecum	feces	0.365385
		ileum	0.536577
		colon	0.401777
		jejunum	0.918587
Aerococcus	feces	ileum	0.0548298
		colon	0.842036
		jejunum	0.130414
		cecum	0.0148637
	ileum	feces	0.0548298
		colon	0.0272594
		jejunum	0.694881
		cecum	0.939282
	colon	feces	0.842036
		ileum	0.0272594
		jejunum	0.0666844
		cecum	0.00641791
	jejunum	feces	0.130414
		ileum	0.694881
		colon	0.0666844
		cecum	0.535771
	cecum	feces	0.0148637
		ileum	0.939282
		colon	0.00641791
		jejunum	0.535771
Aeromonas	feces	ileum	1.32098e-10
		colon	0.000197173
		jejunum	2.21215e-08
		cecum	0.000140903
	ileum	feces	1.32098e-10
		colon	1.0562e-07
		jejunum	0.0010102
		cecum	1.30411e-07
	colon	feces	0.000197173
		ileum	1.0562e-07
		jejunum	0.000464882
		cecum	0.944509
	jejunum	feces	2.21215e-08
		ileum	0.0010102
		colon	0.000464882
		cecum	0.000648527
	cecum	feces	0.000140903
		ileum	1.30411e-07
		colon	0.944509
		jejunum	0.000648527
Akkermansia	feces	ileum	0.433608
		colon	0.124437
		jejunum	0.848517
		cecum	0.70449
	ileum	feces	0.433608
		colon	0.761239
		jejunum	0.296092
		cecum	0.733456
	colon	feces	0.124437
		ileum	0.761239
		jejunum	0.0739957
		cecum	0.343509
	jejunum	feces	0.848517
		ileum	0.296092
		colon	0.0739957
		cecum	0.51626
	cecum	feces	0.70449
		ileum	0.733456
		colon	0.343509
		jejunum	0.51626
Alcanivorax	feces	ileum	0.892753
		colon	0.37902
		jejunum	0.842844
		cecum	0.270557
	ileum	feces	0.892753
		colon	0.609844
		jejunum	0.742597
		cecum	0.501916
	colon	feces	0.37902
		ileum	0.609844
		jejunum	0.236336
		cecum	0.907089
	jejunum	feces	0.842844
		ileum	0.742597
		colon	0.236336
		cecum	0.165946
	cecum	feces	0.270557
		ileum	0.501916
		colon	0.907089
		jejunum	0.165946
Algoriphagus	feces	ileum	0.083865
		colon	0.0189956
		jejunum	0.158363
		cecum	0.0151288
	ileum	feces	0.083865
		colon	0.877242
		jejunum	0.758587
		cecum	0.842844
	colon	feces	0.0189956
		ileum	0.877242
		jejunum	0.528854
		cecum	0.963426
	jejunum	feces	0.158363
		ileum	0.758587
		colon	0.528854
		cecum	0.478994
	cecum	feces	0.0151288
		ileum	0.842844
		colon	0.963426
		jejunum	0.478994
Alistipes	feces	ileum	0.14634
		colon	0.428739
		jejunum	0.954369
		cecum	0.458339
	ileum	feces	0.14634
		colon	0.563432
		jejunum	0.190805
		cecum	0.536577
	colon	feces	0.428739
		ileum	0.563432
		jejunum	0.509828
		cecum	0.967721
	jejunum	feces	0.954369
		ileum	0.190805
		colon	0.509828
		cecum	0.541919
	cecum	feces	0.458339
		ileum	0.536577
		colon	0.967721
		jejunum	0.541919
Allisonella	feces	ileum	0.204209
		colon	0.186481
		jejunum	0.26405
		cecum	0.080854
	ileum	feces	0.204209
		colon	0.919394
		jejunum	0.864386
		cecum	0.918587
	colon	feces	0.186481
		ileum	0.919394
		jejunum	0.93918
		cecum	0.798884
	jejunum	feces	0.26405
		ileum	0.864386
		colon	0.93918
		cecum	0.72855
	cecum	feces	0.080854
		ileum	0.918587
		colon	0.798884
		jejunum	0.72855
Allobaculum	feces	ileum	0.818098
		colon	0.754437
		jejunum	0.241719
		cecum	0.45182
	ileum	feces	0.818098
		colon	0.561725
		jejunum	0.536704
		cecum	0.772659
	colon	feces	0.754437
		ileum	0.561725
		jejunum	0.0974106
		cecum	0.210896
	jejunum	feces	0.241719
		ileum	0.536704
		colon	0.0974106
		cecum	0.780537
	cecum	feces	0.45182
		ileum	0.772659
		colon	0.210896
		jejunum	0.780537
Anaerobaculum	feces	ileum	0.686772
		colon	0.707633
		jejunum	0.0992277
		cecum	0.980043
	ileum	feces	0.686772
		colon	0.946552
		jejunum	0.438811
		cecum	0.664628
	colon	feces	0.707633
		ileum	0.946552
		jejunum	0.276126
		cecum	0.686772
	jejunum	feces	0.0992277
		ileum	0.438811
		colon	0.276126
		cecum	0.091568
	cecum	feces	0.980043
		ileum	0.664628
		colon	0.686772
		jejunum	0.091568
Anaerobiospirillum	feces	ileum	0.863541
		colon	0.886889
		jejunum	0.938889
		cecum	0.149278
	ileum	feces	0.863541
		colon	0.963426
		jejunum	0.803073
		cecum	0.134773
	colon	feces	0.886889
		ileum	0.963426
		jejunum	0.817239
		cecum	0.090354
	jejunum	feces	0.938889
		ileum	0.803073
		colon	0.817239
		cecum	0.220188
	cecum	feces	0.149278
		ileum	0.134773
		colon	0.090354
		jejunum	0.220188
Anaerococcus	feces	ileum	0.912236
		colon	0.288804
		jejunum	0.796146
		cecum	0.694249
	ileum	feces	0.912236
		colon	0.49906
		jejunum	0.918587
		cecum	0.851522
	colon	feces	0.288804
		ileum	0.49906
		jejunum	0.552055
		cecum	0.63419
	jejunum	feces	0.796146
		ileum	0.918587
		colon	0.552055
		cecum	0.934788
	cecum	feces	0.694249
		ileum	0.851522
		colon	0.63419
		jejunum	0.934788
Anaerofustis	feces	ileum	0.171593
		colon	0.0805246
		jejunum	0.192446
		cecum	0.234734
	ileum	feces	0.171593
		colon	0.963426
		jejunum	0.89681
		cecum	0.815995
	colon	feces	0.0805246
		ileum	0.963426
		jejunum	0.827538
		cecum	0.723704
	jejunum	feces	0.192446
		ileum	0.89681
		colon	0.827538
		cecum	0.923824
	cecum	feces	0.234734
		ileum	0.815995
		colon	0.723704
		jejunum	0.923824
Anaeroplasma	feces	ileum	0.991735
		colon	0.0512156
		jejunum	0.895624
		cecum	0.343179
	ileum	feces	0.991735
		colon	0.0969772
		jejunum	0.902096
		cecum	0.430221
	colon	feces	0.0512156
		ileum	0.0969772
		jejunum	0.0998393
		cecum	0.44871
	jejunum	feces	0.895624
		ileum	0.902096
		colon	0.0998393
		cecum	0.497853
	cecum	feces	0.343179
		ileum	0.430221
		colon	0.44871
		jejunum	0.497853
Anaerosporobacter	feces	ileum	0.00639204
		colon	0.0471748
		jejunum	0.00782587
		cecum	0.0963918
	ileum	feces	0.00639204
		colon	3.70874e-05
		jejunum	0.806834
		cecum	7.94265e-05
	colon	feces	0.0471748
		ileum	3.70874e-05
		jejunum	2.41413e-05
		cecum	0.842844
	jejunum	feces	0.00782587
		ileum	0.806834
		colon	2.41413e-05
		cecum	5.82345e-05
	cecum	feces	0.0963918
		ileum	7.94265e-05
		colon	0.842844
		jejunum	5.82345e-05
Anaerovibrio	feces	ileum	0.131857
		colon	0.869417
		jejunum	0.0651432
		cecum	0.262907
	ileum	feces	0.131857
		colon	0.207808
		jejunum	0.953326
		cecum	0.00922623
	colon	feces	0.869417
		ileum	0.207808
		jejunum	0.113619
		cecum	0.159714
	jejunum	feces	0.0651432
		ileum	0.953326
		colon	0.113619
		cecum	0.00254008
	cecum	feces	0.262907
		ileum	0.00922623
		colon	0.159714
		jejunum	0.00254008
Arthrobacter	feces	ileum	0.444029
		colon	0.808539
		jejunum	0.20855
		cecum	0.961342
	ileum	feces	0.444029
		colon	0.265654
		jejunum	0.857025
		cecum	0.487926
	colon	feces	0.808539
		ileum	0.265654
		jejunum	0.0987615
		cecum	0.755882
	jejunum	feces	0.20855
		ileum	0.857025
		colon	0.0987615
		cecum	0.243344
	cecum	feces	0.961342
		ileum	0.487926
		colon	0.755882
		jejunum	0.243344
Asteroleplasma	feces	ileum	0.784682
		colon	0.549598
		jejunum	0.62036
		cecum	0.905576
	ileum	feces	0.784682
		colon	0.371108
		jejunum	0.918587
		cecum	0.876662
	colon	feces	0.549598
		ileum	0.371108
		jejunum	0.20668
		cecum	0.432658
	jejunum	feces	0.62036
		ileum	0.918587
		colon	0.20668
		cecum	0.748218
	cecum	feces	0.905576
		ileum	0.876662
		colon	0.432658
		jejunum	0.748218
Atopostipes	feces	ileum	0.18802
		colon	0.536704
		jejunum	0.390704
		cecum	0.884288
	ileum	feces	0.18802
		colon	0.0423134
		jejunum	0.725532
		cecum	0.125493
	colon	feces	0.536704
		ileum	0.0423134
		jejunum	0.0898601
		cecum	0.69641
	jejunum	feces	0.390704
		ileum	0.725532
		colon	0.0898601
		cecum	0.26528
	cecum	feces	0.884288
		ileum	0.125493
		colon	0.69641
		jejunum	0.26528
Bifidobacterium	feces	ileum	0.00184371
		colon	0.0647079
		jejunum	0.00121093
		cecum	0.0102501
	ileum	feces	0.00184371
		colon	0.131857
		jejunum	0.88411
		cecum	0.402232
	colon	feces	0.0647079
		ileum	0.131857
		jejunum	0.152023
		cecum	0.587777
	jejunum	feces	0.00121093
		ileum	0.88411
		colon	0.152023
		cecum	0.48586
	cecum	feces	0.0102501
		ileum	0.402232
		colon	0.587777
		jejunum	0.48586
Blautia	feces	ileum	1.0562e-07
		colon	0.493043
		jejunum	2.21215e-08
		cecum	0.499538
	ileum	feces	1.0562e-07
		colon	5.05781e-07
		jejunum	0.905576
		cecum	5.0046e-07
	colon	feces	0.493043
		ileum	5.05781e-07
		jejunum	1.36402e-07
		cecum	0.992971
	jejunum	feces	2.21215e-08
		ileum	0.905576
		colon	1.36402e-07
		cecum	1.3565e-07
	cecum	feces	0.499538
		ileum	5.0046e-07
		colon	0.992971
		jejunum	1.3565e-07
Bosea	feces	ileum	0.0628731
		colon	0.401932
		jejunum	0.669597
		cecum	0.72855
	ileum	feces	0.0628731
		colon	0.00658484
		jejunum	0.0197698
		cecum	0.0209075
	colon	feces	0.401932
		ileum	0.00658484
		jejunum	0.806834
		cecum	0.72855
	jejunum	feces	0.669597
		ileum	0.0197698
		colon	0.806834
		cecum	0.951665
	cecum	feces	0.72855
		ileum	0.0209075
		colon	0.72855
		jejunum	0.951665
Brevibacillus	feces	ileum	0.953183
		colon	0.868584
		jejunum	0.86728
		cecum	0.991735
	ileum	feces	0.953183
		colon	0.943691
		jejunum	0.831281
		cecum	0.943691
	colon	feces	0.868584
		ileum	0.943691
		jejunum	0.719341
		cecum	0.858669
	jejunum	feces	0.86728
		ileum	0.831281
		colon	0.719341
		cecum	0.876662
	cecum	feces	0.991735
		ileum	0.943691
		colon	0.858669
		jejunum	0.876662
Brevundimonas	feces	ileum	0.957738
		colon	0.00429528
		jejunum	0.438811
		cecum	0.405596
	ileum	feces	0.957738
		colon	0.0107015
		jejunum	0.462429
		cecum	0.438811
	colon	feces	0.00429528
		ileum	0.0107015
		jejunum	0.069883
		cecum	0.0608691
	jejunum	feces	0.438811
		ileum	0.462429
		colon	0.069883
		cecum	0.992548
	cecum	feces	0.405596
		ileum	0.438811
		colon	0.0608691
		jejunum	0.992548
Brochothrix	feces	ileum	0.000101358
		colon	0.00373053
		jejunum	0.00624291
		cecum	0.031317
	ileum	feces	0.000101358
		colon	0.120351
		jejunum	0.117607
		cecum	0.0235755
	colon	feces	0.00373053
		ileum	0.120351
		jejunum	0.963426
		cecum	0.535771
	jejunum	feces	0.00624291
		ileum	0.117607
		colon	0.963426
		cecum	0.598366
	cecum	feces	0.031317
		ileum	0.0235755
		colon	0.535771
		jejunum	0.598366
Brucella	feces	ileum	0.737111
		colon	0.905576
		jejunum	0.275075
		cecum	0.45182
	ileum	feces	0.737111
		colon	0.835159
		jejunum	0.677355
		cecum	0.254854
	colon	feces	0.905576
		ileum	0.835159
		jejunum	0.382105
		cecum	0.337342
	jejunum	feces	0.275075
		ileum	0.677355
		colon	0.382105
		cecum	0.0417927
	cecum	feces	0.45182
		ileum	0.254854
		colon	0.337342
		jejunum	0.0417927
Bulleidia	feces	ileum	5.53201e-06
		colon	0.651914
		jejunum	7.66006e-07
		cecum	0.27473
	ileum	feces	5.53201e-06
		colon	2.41413e-05
		jejunum	0.963426
		cecum	0.000108637
	colon	feces	0.651914
		ileum	2.41413e-05
		jejunum	3.55541e-06
		cecum	0.653356
	jejunum	feces	7.66006e-07
		ileum	0.963426
		colon	3.55541e-06
		cecum	1.90868e-05
	cecum	feces	0.27473
		ileum	0.000108637
		colon	0.653356
		jejunum	1.90868e-05
Butyricicoccus	feces	ileum	0.000120876
		colon	0.0874474
		jejunum	1.95233e-05
		cecum	0.23311
	ileum	feces	0.000120876
		colon	0.0103199
		jejunum	0.955628
		cecum	0.00352247
	colon	feces	0.0874474
		ileum	0.0103199
		jejunum	0.00309126
		cecum	0.74693
	jejunum	feces	1.95233e-05
		ileum	0.955628
		colon	0.00309126
		cecum	0.000805239
	cecum	feces	0.23311
		ileum	0.00352247
		colon	0.74693
		jejunum	0.000805239
Butyricimonas	feces	ileum	2.93511e-05
		colon	0.00035289
		jejunum	3.50557e-05
		cecum	7.23777e-05
	ileum	feces	2.93511e-05
		colon	0.199973
		jejunum	0.694274
		cecum	0.43768
	colon	feces	0.00035289
		ileum	0.199973
		jejunum	0.442427
		cecum	0.70449
	jejunum	feces	3.50557e-05
		ileum	0.694274
		colon	0.442427
		cecum	0.780537
	cecum	feces	7.23777e-05
		ileum	0.43768
		colon	0.70449
		jejunum	0.780537
Campylobacter	feces	ileum	0.439647
		colon	0.163027
		jejunum	0.505666
		cecum	0.0110607
	ileum	feces	0.439647
		colon	0.030834
		jejunum	0.904601
		cecum	0.00241293
	colon	feces	0.163027
		ileum	0.030834
		jejunum	0.0266593
		cecum	0.348939
	jejunum	feces	0.505666
		ileum	0.904601
		colon	0.0266593
		cecum	0.00146703
	cecum	feces	0.0110607
		ileum	0.00241293
		colon	0.348939
		jejunum	0.00146703
Catenibacterium	feces	ileum	1.41079e-05
		colon	0.54375
		jejunum	2.59212e-06
		cecum	0.00558234
	ileum	feces	1.41079e-05
		colon	9.26343e-05
		jejunum	0.992723
		cecum	0.0163068
	colon	feces	0.54375
		ileum	9.26343e-05
		jejunum	2.04314e-05
		cecum	0.043464
	jejunum	feces	2.59212e-06
		ileum	0.992723
		colon	2.04314e-05
		cecum	0.00723719
	cecum	feces	0.00558234
		ileum	0.0163068
		colon	0.043464
		jejunum	0.00723719
Caulobacter	feces	ileum	0.112023
		colon	0.89681
		jejunum	0.61084
		cecum	0.699144
	ileum	feces	0.112023
		colon	0.164328
		jejunum	0.372286
		cecum	0.276927
	colon	feces	0.89681
		ileum	0.164328
		jejunum	0.750497
		cecum	0.829429
	jejunum	feces	0.61084
		ileum	0.372286
		colon	0.750497
		cecum	0.931783
	cecum	feces	0.699144
		ileum	0.276927
		colon	0.829429
		jejunum	0.931783
Chlamydia	feces	ileum	0.536765
		colon	0.0141275
		jejunum	0.00519419
		cecum	0.0361992
	ileum	feces	0.536765
		colon	0.216611
		jejunum	0.100099
		cecum	0.367022
	colon	feces	0.0141275
		ileum	0.216611
		jejunum	0.74693
		cecum	0.819703
	jejunum	feces	0.00519419
		ileum	0.100099
		colon	0.74693
		cecum	0.521777
	cecum	feces	0.0361992
		ileum	0.367022
		colon	0.819703
		jejunum	0.521777
Chryseobacterium	feces	ileum	0.0541275
		colon	0.409084
		jejunum	0.112225
		cecum	0.935131
	ileum	feces	0.0541275
		colon	0.00573625
		jejunum	0.732347
		cecum	0.0399235
	colon	feces	0.409084
		ileum	0.00573625
		jejunum	0.0102501
		cecum	0.493043
	jejunum	feces	0.112225
		ileum	0.732347
		colon	0.0102501
		cecum	0.0823633
	cecum	feces	0.935131
		ileum	0.0399235
		colon	0.493043
		jejunum	0.0823633
Cloacibacillus	feces	ileum	1.85652e-06
		colon	1.55896e-06
		jejunum	1.55896e-06
		cecum	1.0562e-07
	ileum	feces	1.85652e-06
		colon	0.546973
		jejunum	0.694382
		cecum	0.887763
	colon	feces	1.55896e-06
		ileum	0.546973
		jejunum	0.89293
		cecum	0.310815
	jejunum	feces	1.55896e-06
		ileum	0.694382
		colon	0.89293
		cecum	0.465066
	cecum	feces	1.0562e-07
		ileum	0.887763
		colon	0.310815
		jejunum	0.465066
Clostridium	feces	ileum	0.000411603
		colon	0.230629
		jejunum	0.00018782
		cecum	0.18802
	ileum	feces	0.000411603
		colon	0.0103867
		jejunum	0.908033
		cecum	0.0135595
	colon	feces	0.230629
		ileum	0.0103867
		jejunum	0.00782587
		cecum	0.951932
	jejunum	feces	0.00018782
		ileum	0.908033
		colon	0.00782587
		cecum	0.0102966
	cecum	feces	0.18802
		ileum	0.0135595
		colon	0.951932
		jejunum	0.0102966
Collinsella	feces	ileum	5.0046e-07
		colon	0.00169088
		jejunum	6.80353e-07
		cecum	0.00702157
	ileum	feces	5.0046e-07
		colon	0.0012926
		jejunum	0.536577
		cecum	0.00035289
	colon	feces	0.00169088
		ileum	0.0012926
		jejunum	0.00519419
		cecum	0.725532
	jejunum	feces	6.80353e-07
		ileum	0.536577
		colon	0.00519419
		cecum	0.0012745
	cecum	feces	0.00702157
		ileum	0.00035289
		colon	0.725532
		jejunum	0.0012745
Comamonas	feces	ileum	0.14729
		colon	0.646895
		jejunum	0.784682
		cecum	0.0506445
	ileum	feces	0.14729
		colon	0.392225
		jejunum	0.311985
		cecum	0.912943
	colon	feces	0.646895
		ileum	0.392225
		jejunum	0.908937
		cecum	0.198108
	jejunum	feces	0.784682
		ileum	0.311985
		colon	0.908937
		cecum	0.151718
	cecum	feces	0.0506445
		ileum	0.912943
		colon	0.198108
		jejunum	0.151718
Conexibacter	feces	ileum	0.402232
		colon	0.0263605
		jejunum	0.188729
		cecum	0.0103492
	ileum	feces	0.402232
		colon	0.438811
		jejunum	0.869417
		cecum	0.271858
	colon	feces	0.0263605
		ileum	0.438811
		jejunum	0.549598
		cecum	0.823382
	jejunum	feces	0.188729
		ileum	0.869417
		colon	0.549598
		cecum	0.35083
	cecum	feces	0.0103492
		ileum	0.271858
		colon	0.823382
		jejunum	0.35083
Coprobacillus	feces	ileum	0.0781236
		colon	0.394338
		jejunum	0.14729
		cecum	0.215042
	ileum	feces	0.0781236
		colon	0.00830257
		jejunum	0.758268
		cecum	0.00371917
	colon	feces	0.394338
		ileum	0.00830257
		jejunum	0.0134506
		cecum	0.819897
	jejunum	feces	0.14729
		ileum	0.758268
		colon	0.0134506
		cecum	0.00551612
	cecum	feces	0.215042
		ileum	0.00371917
		colon	0.819897
		jejunum	0.00551612
Coprococcus	feces	ileum	9.26343e-05
		colon	0.196106
		jejunum	1.69906e-05
		cecum	0.8095
	ileum	feces	9.26343e-05
		colon	2.97583e-06
		jejunum	0.968061
		cecum	3.79306e-05
	colon	feces	0.196106
		ileum	2.97583e-06
		jejunum	4.6258e-07
		cecum	0.377093
	jejunum	feces	1.69906e-05
		ileum	0.968061
		colon	4.6258e-07
		cecum	6.31754e-06
	cecum	feces	0.8095
		ileum	3.79306e-05
		colon	0.377093
		jejunum	6.31754e-06
Coprothermobacter	feces	ileum	0.727869
		colon	0.335045
		jejunum	0.021369
		cecum	0.44871
	ileum	feces	0.727869
		colon	0.758587
		jejunum	0.149805
		cecum	0.858439
	colon	feces	0.335045
		ileum	0.758587
		jejunum	0.247105
		cecum	0.905576
	jejunum	feces	0.021369
		ileum	0.149805
		colon	0.247105
		cecum	0.173464
	cecum	feces	0.44871
		ileum	0.858439
		colon	0.905576
		jejunum	0.173464
Corynebacterium	feces	ileum	0.724568
		colon	0.912085
		jejunum	0.703142
		cecum	0.423985
	ileum	feces	0.724568
		colon	0.816765
		jejunum	0.982958
		cecum	0.842036
	colon	feces	0.912085
		ileum	0.816765
		jejunum	0.809102
		cecum	0.535771
	jejunum	feces	0.703142
		ileum	0.982958
		colon	0.809102
		cecum	0.798627
	cecum	feces	0.423985
		ileum	0.842036
		colon	0.535771
		jejunum	0.798627
Deinococcus	feces	ileum	0.276126
		colon	0.497706
		jejunum	0.957738
		cecum	0.606823
	ileum	feces	0.276126
		colon	0.72855
		jejunum	0.339073
		cecum	0.627942
	colon	feces	0.497706
		ileum	0.72855
		jejunum	0.575317
		cecum	0.918587
	jejunum	feces	0.957738
		ileum	0.339073
		colon	0.575317
		cecum	0.694223
	cecum	feces	0.606823
		ileum	0.627942
		colon	0.918587
		jejunum	0.694223
Desulfovibrio	feces	ileum	0.0207302
		colon	0.750497
		jejunum	0.234734
		cecum	0.994346
	ileum	feces	0.0207302
		colon	0.00699249
		jejunum	0.301697
		cecum	0.0209075
	colon	feces	0.750497
		ileum	0.00699249
		jejunum	0.0919216
		cecum	0.74693
	jejunum	feces	0.234734
		ileum	0.301697
		colon	0.0919216
		cecum	0.237337
	cecum	feces	0.994346
		ileum	0.0209075
		colon	0.74693
		jejunum	0.237337
Dorea	feces	ileum	4.18444e-07
		colon	0.0774008
		jejunum	2.39702e-07
		cecum	0.00668449
	ileum	feces	4.18444e-07
		colon	2.74098e-05
		jejunum	0.737111
		cecum	0.000293473
	colon	feces	0.0774008
		ileum	2.74098e-05
		jejunum	2.5362e-05
		cecum	0.438811
	jejunum	feces	2.39702e-07
		ileum	0.737111
		colon	2.5362e-05
		cecum	0.000364845
	cecum	feces	0.00668449
		ileum	0.000293473
		colon	0.438811
		jejunum	0.000364845
Empedobacter	feces	ileum	0.00233197
		colon	0.00034397
		jejunum	0.000559004
		cecum	0.00170895
	ileum	feces	0.00233197
		colon	0.96028
		jejunum	0.963426
		cecum	0.808137
	colon	feces	0.00034397
		ileum	0.96028
		jejunum	0.991735
		cecum	0.704083
	jejunum	feces	0.000559004
		ileum	0.963426
		colon	0.991735
		cecum	0.73027
	cecum	feces	0.00170895
		ileum	0.808137
		colon	0.704083
		jejunum	0.73027
Enhydrobacter	feces	ileum	0.000206691
		colon	0.154779
		jejunum	5.04007e-05
		cecum	0.0191043
	ileum	feces	0.000206691
		colon	0.00932496
		jejunum	0.992723
		cecum	0.0655667
	colon	feces	0.154779
		ileum	0.00932496
		jejunum	0.00385065
		cecum	0.475067
	jejunum	feces	5.04007e-05
		ileum	0.992723
		colon	0.00385065
		cecum	0.0376126
	cecum	feces	0.0191043
		ileum	0.0655667
		colon	0.475067
		jejunum	0.0376126
Enterococcus	feces	ileum	0.0209075
		colon	0.00205844
		jejunum	0.0102501
		cecum	0.00558234
	ileum	feces	0.0209075
		colon	0.809102
		jejunum	0.982255
		cecum	0.963426
	colon	feces	0.00205844
		ileum	0.809102
		jejunum	0.758587
		cecum	0.818403
	jejunum	feces	0.0102501
		ileum	0.982255
		colon	0.758587
		cecum	0.946552
	cecum	feces	0.00558234
		ileum	0.963426
		colon	0.818403
		jejunum	0.946552
Enterorhabdus	feces	ileum	2.41413e-05
		colon	0.000269811
		jejunum	1.95803e-06
		cecum	0.00022119
	ileum	feces	2.41413e-05
		colon	0.203982
		jejunum	0.865559
		cecum	0.224023
	colon	feces	0.000269811
		ileum	0.203982
		jejunum	0.0726811
		cecum	0.965938
	jejunum	feces	1.95803e-06
		ileum	0.865559
		colon	0.0726811
		cecum	0.0818635
	cecum	feces	0.00022119
		ileum	0.224023
		colon	0.965938
		jejunum	0.0818635
Erysipelothrix	feces	ileum	0.993139
		colon	0.483163
		jejunum	0.992723
		cecum	0.679125
	ileum	feces	0.993139
		colon	0.570729
		jejunum	0.997711
		cecum	0.738676
	colon	feces	0.483163
		ileum	0.570729
		jejunum	0.516117
		cecum	0.857025
	jejunum	feces	0.992723
		ileum	0.997711
		colon	0.516117
		cecum	0.701188
	cecum	feces	0.679125
		ileum	0.738676
		colon	0.857025
		jejunum	0.701188
Erythrobacter	feces	ileum	0.327966
		colon	0.806834
		jejunum	0.452444
		cecum	0.694249
	ileum	feces	0.327966
		colon	0.184219
		jejunum	0.84357
		cecum	0.131857
	colon	feces	0.806834
		ileum	0.184219
		jejunum	0.254109
		cecum	0.910521
	jejunum	feces	0.452444
		ileum	0.84357
		colon	0.254109
		cecum	0.183822
	cecum	feces	0.694249
		ileum	0.131857
		colon	0.910521
		jejunum	0.183822
Escherichia/Shigella	feces	ileum	0.00342588
		colon	0.116319
		jejunum	0.000559004
		cecum	0.0741659
	ileum	feces	0.00342588
		colon	0.129556
		jejunum	0.906158
		cecum	0.185942
	colon	feces	0.116319
		ileum	0.129556
		jejunum	0.0487064
		cecum	0.901542
	jejunum	feces	0.000559004
		ileum	0.906158
		colon	0.0487064
		cecum	0.0780398
	cecum	feces	0.0741659
		ileum	0.185942
		colon	0.901542
		jejunum	0.0780398
Eubacterium	feces	ileum	9.10902e-09
		colon	0.121718
		jejunum	9.10902e-09
		cecum	0.031317
	ileum	feces	9.10902e-09
		colon	1.80761e-07
		jejunum	0.488552
		cecum	5.75314e-07
	colon	feces	0.121718
		ileum	1.80761e-07
		jejunum	2.52747e-07
		cecum	0.686304
	jejunum	feces	9.10902e-09
		ileum	0.488552
		colon	2.52747e-07
		cecum	1.01696e-06
	cecum	feces	0.031317
		ileum	5.75314e-07
		colon	0.686304
		jejunum	1.01696e-06
Facklamia	feces	ileum	0.00785742
		colon	0.000804448
		jejunum	0.00262178
		cecum	0.00060572
	ileum	feces	0.00785742
		colon	0.862056
		jejunum	0.976052
		cecum	0.817239
	colon	feces	0.000804448
		ileum	0.862056
		jejunum	0.866787
		cecum	0.958227
	jejunum	feces	0.00262178
		ileum	0.976052
		colon	0.866787
		cecum	0.818098
	cecum	feces	0.00060572
		ileum	0.817239
		colon	0.958227
		jejunum	0.818098
Faecalibacterium	feces	ileum	1.98395e-05
		colon	0.236336
		jejunum	2.974e-06
		cecum	0.278286
	ileum	feces	1.98395e-05
		colon	0.000537223
		jejunum	0.967721
		cecum	0.000412972
	colon	feces	0.236336
		ileum	0.000537223
		jejunum	0.000108637
		cecum	0.954369
	jejunum	feces	2.974e-06
		ileum	0.967721
		colon	0.000108637
		cecum	8.24087e-05
	cecum	feces	0.278286
		ileum	0.000412972
		colon	0.954369
		jejunum	8.24087e-05
Fibrobacter	feces	ileum	0.101188
		colon	0.862458
		jejunum	0.220987
		cecum	0.219
	ileum	feces	0.101188
		colon	0.0605284
		jejunum	0.723704
		cecum	0.686772
	colon	feces	0.862458
		ileum	0.0605284
		jejunum	0.129846
		cecum	0.125493
	jejunum	feces	0.220987
		ileum	0.723704
		colon	0.129846
		cecum	0.971357
	cecum	feces	0.219
		ileum	0.686772
		colon	0.125493
		jejunum	0.971357
Fusobacterium	feces	ileum	0.908477
		colon	0.540479
		jejunum	0.982958
		cecum	0.887763
	ileum	feces	0.908477
		colon	0.74693
		jejunum	0.899232
		cecum	0.804222
	colon	feces	0.540479
		ileum	0.74693
		jejunum	0.540479
		cecum	0.405596
	jejunum	feces	0.982958
		ileum	0.899232
		colon	0.540479
		cecum	0.910521
	cecum	feces	0.887763
		ileum	0.804222
		colon	0.405596
		jejunum	0.910521
Gallibacterium	feces	ileum	0.412542
		colon	0.902637
		jejunum	0.171593
		cecum	0.493043
	ileum	feces	0.412542
		colon	0.517743
		jejunum	0.838285
		cecum	0.105077
	colon	feces	0.902637
		ileum	0.517743
		jejunum	0.247831
		cecum	0.376038
	jejunum	feces	0.171593
		ileum	0.838285
		colon	0.247831
		cecum	0.0252327
	cecum	feces	0.493043
		ileum	0.105077
		colon	0.376038
		jejunum	0.0252327
Gallicola	feces	ileum	0.0174863
		colon	0.963426
		jejunum	0.170504
		cecum	0.798884
	ileum	feces	0.0174863
		colon	0.0207934
		jejunum	0.349583
		cecum	0.00703223
	colon	feces	0.963426
		ileum	0.0207934
		jejunum	0.196585
		cecum	0.751185
	jejunum	feces	0.170504
		ileum	0.349583
		colon	0.196585
		cecum	0.0765765
	cecum	feces	0.798884
		ileum	0.00703223
		colon	0.751185
		jejunum	0.0765765
Gardnerella	feces	ileum	0.0254708
		colon	0.826676
		jejunum	0.458339
		cecum	0.409998
	ileum	feces	0.0254708
		colon	0.0116266
		jejunum	0.184879
		cecum	0.00254008
	colon	feces	0.826676
		ileum	0.0116266
		jejunum	0.273272
		cecum	0.623176
	jejunum	feces	0.458339
		ileum	0.184879
		colon	0.273272
		cecum	0.0766862
	cecum	feces	0.409998
		ileum	0.00254008
		colon	0.623176
		jejunum	0.0766862
Hafnia	feces	ileum	0.857025
		colon	0.938307
		jejunum	0.886593
		cecum	0.0569677
	ileum	feces	0.857025
		colon	0.917711
		jejunum	0.963148
		cecum	0.199615
	colon	feces	0.938307
		ileum	0.917711
		jejunum	0.954369
		cecum	0.0780398
	jejunum	feces	0.886593
		ileum	0.963148
		colon	0.954369
		cecum	0.113855
	cecum	feces	0.0569677
		ileum	0.199615
		colon	0.0780398
		jejunum	0.113855
Haliea	feces	ileum	0.0100187
		colon	0.00184484
		jejunum	0.0403645
		cecum	0.000164095
	ileum	feces	0.0100187
		colon	0.942006
		jejunum	0.561725
		cecum	0.520389
	colon	feces	0.00184484
		ileum	0.942006
		jejunum	0.40411
		cecum	0.524717
	jejunum	feces	0.0403645
		ileum	0.561725
		colon	0.40411
		cecum	0.0912019
	cecum	feces	0.000164095
		ileum	0.520389
		colon	0.524717
		jejunum	0.0912019
Halomonas	feces	ileum	0.56856
		colon	0.884288
		jejunum	0.173271
		cecum	0.677355
	ileum	feces	0.56856
		colon	0.444029
		jejunum	0.691763
		cecum	0.882432
	colon	feces	0.884288
		ileum	0.444029
		jejunum	0.107636
		cecum	0.517577
	jejunum	feces	0.173271
		ileum	0.691763
		colon	0.107636
		cecum	0.45182
	cecum	feces	0.677355
		ileum	0.882432
		colon	0.517577
		jejunum	0.45182
Helicobacter	feces	ileum	0.865264
		colon	0.963426
		jejunum	0.112023
		cecum	0.0894989
	ileum	feces	0.865264
		colon	0.901542
		jejunum	0.29148
		cecum	0.26528
	colon	feces	0.963426
		ileum	0.901542
		jejunum	0.130414
		cecum	0.106334
	jejunum	feces	0.112023
		ileum	0.29148
		colon	0.130414
		cecum	0.985051
	cecum	feces	0.0894989
		ileum	0.26528
		colon	0.106334
		jejunum	0.985051
Hespellia	feces	ileum	0.0765583
		colon	0.0111438
		jejunum	0.0373343
		cecum	0.00388091
	ileum	feces	0.0765583
		colon	0.816765
		jejunum	0.968061
		cecum	0.59798
	colon	feces	0.0111438
		ileum	0.816765
		jejunum	0.824336
		cecum	0.796146
	jejunum	feces	0.0373343
		ileum	0.968061
		colon	0.824336
		cecum	0.575317
	cecum	feces	0.00388091
		ileum	0.59798
		colon	0.796146
		jejunum	0.575317
Holdemania	feces	ileum	0.00658484
		colon	0.401932
		jejunum	0.000868166
		cecum	0.767001
	ileum	feces	0.00658484
		colon	0.0628731
		jejunum	0.854413
		cecum	0.0181904
	colon	feces	0.401932
		ileum	0.0628731
		jejunum	0.0135595
		cecum	0.686772
	jejunum	feces	0.000868166
		ileum	0.854413
		colon	0.0135595
		cecum	0.00305908
	cecum	feces	0.767001
		ileum	0.0181904
		colon	0.686772
		jejunum	0.00305908
Howardella	feces	ileum	0.00211875
		colon	0.229637
		jejunum	0.000578049
		cecum	0.782996
	ileum	feces	0.00211875
		colon	0.0463719
		jejunum	0.985051
		cecum	0.00579454
	colon	feces	0.229637
		ileum	0.0463719
		jejunum	0.0216232
		cecum	0.452548
	jejunum	feces	0.000578049
		ileum	0.985051
		colon	0.0216232
		cecum	0.00189502
	cecum	feces	0.782996
		ileum	0.00579454
		colon	0.452548
		jejunum	0.00189502
Hydrogenoanaerobacterium	feces	ileum	0.570843
		colon	0.347103
		jejunum	0.443146
		cecum	0.0730675
	ileum	feces	0.570843
		colon	0.899987
		jejunum	0.954369
		cecum	0.477475
	colon	feces	0.347103
		ileum	0.899987
		jejunum	0.943691
		cecum	0.536577
	jejunum	feces	0.443146
		ileum	0.954369
		colon	0.943691
		cecum	0.478994
	cecum	feces	0.0730675
		ileum	0.477475
		colon	0.536577
		jejunum	0.478994
Idiomarina	feces	ileum	0.963426
		colon	0.428739
		jejunum	0.694382
		cecum	0.820379
	ileum	feces	0.963426
		colon	0.46356
		jejunum	0.694382
		cecum	0.808137
	colon	feces	0.428739
		ileum	0.46356
		jejunum	0.809102
		cecum	0.65129
	jejunum	feces	0.694382
		ileum	0.694382
		colon	0.809102
		cecum	0.887763
	cecum	feces	0.820379
		ileum	0.808137
		colon	0.65129
		jejunum	0.887763
Janibacter	feces	ileum	0.910521
		colon	0.100136
		jejunum	0.869417
		cecum	0.261643
	ileum	feces	0.910521
		colon	0.246252
		jejunum	0.790103
		cecum	0.467114
	colon	feces	0.100136
		ileum	0.246252
		jejunum	0.0655667
		cecum	0.748234
	jejunum	feces	0.869417
		ileum	0.790103
		colon	0.0655667
		cecum	0.174753
	cecum	feces	0.261643
		ileum	0.467114
		colon	0.748234
		jejunum	0.174753
Krokinobacter	feces	ileum	0.887184
		colon	0.870394
		jejunum	0.0640871
		cecum	0.556938
	ileum	feces	0.887184
		colon	0.762427
		jejunum	0.184219
		cecum	0.483755
	colon	feces	0.870394
		ileum	0.762427
		jejunum	0.0347497
		cecum	0.733456
	jejunum	feces	0.0640871
		ileum	0.184219
		colon	0.0347497
		cecum	0.00978886
	cecum	feces	0.556938
		ileum	0.483755
		colon	0.733456
		jejunum	0.00978886
Kurthia	feces	ileum	0.458339
		colon	0.000868166
		jejunum	0.650356
		cecum	0.00568887
	ileum	feces	0.458339
		colon	0.0452449
		jejunum	0.819703
		cecum	0.155693
	colon	feces	0.000868166
		ileum	0.0452449
		jejunum	0.00769516
		cecum	0.631478
	jejunum	feces	0.650356
		ileum	0.819703
		colon	0.00769516
		cecum	0.0399235
	cecum	feces	0.00568887
		ileum	0.155693
		colon	0.631478
		jejunum	0.0399235
Kytococcus	feces	ileum	0.0699766
		colon	0.862458
		jejunum	0.0206381
		cecum	0.784682
	ileum	feces	0.0699766
		colon	0.0395278
		jejunum	0.89697
		cecum	0.150519
	colon	feces	0.862458
		ileum	0.0395278
		jejunum	0.0100512
		cecum	0.601228
	jejunum	feces	0.0206381
		ileum	0.89697
		colon	0.0100512
		cecum	0.0568892
	cecum	feces	0.784682
		ileum	0.150519
		colon	0.601228
		jejunum	0.0568892
Lacticigenium	feces	ileum	0.00380428
		colon	0.904169
		jejunum	0.35083
		cecum	0.938889
	ileum	feces	0.00380428
		colon	0.00608146
		jejunum	0.0581205
		cecum	0.00520188
	colon	feces	0.904169
		ileum	0.00608146
		jejunum	0.46356
		cecum	0.964213
	jejunum	feces	0.35083
		ileum	0.0581205
		colon	0.46356
		cecum	0.428846
	cecum	feces	0.938889
		ileum	0.00520188
		colon	0.964213
		jejunum	0.428846
Lactobacillus	feces	ileum	0.00187874
		colon	0.204209
		jejunum	0.000787308
		cecum	0.497853
	ileum	feces	0.00187874
		colon	0.0477722
		jejunum	0.954369
		cecum	0.013886
	colon	feces	0.204209
		ileum	0.0477722
		jejunum	0.0330016
		cecum	0.69641
	jejunum	feces	0.000787308
		ileum	0.954369
		colon	0.0330016
		cecum	0.0079672
	cecum	feces	0.497853
		ileum	0.013886
		colon	0.69641
		jejunum	0.0079672
Lactococcus	feces	ileum	9.76788e-08
		colon	9.76788e-08
		jejunum	9.62657e-10
		cecum	1.85758e-08
	ileum	feces	9.76788e-08
		colon	0.379176
		jejunum	0.333813
		cecum	0.774279
	colon	feces	9.76788e-08
		ileum	0.379176
		jejunum	0.0156467
		cecum	0.575258
	jejunum	feces	9.62657e-10
		ileum	0.333813
		colon	0.0156467
		cecum	0.0889844
	cecum	feces	1.85758e-08
		ileum	0.774279
		colon	0.575258
		jejunum	0.0889844
Leucobacter	feces	ileum	0.482148
		colon	0.904169
		jejunum	0.858669
		cecum	0.440589
	ileum	feces	0.482148
		colon	0.592753
		jejunum	0.664628
		cecum	0.963426
	colon	feces	0.904169
		ileum	0.592753
		jejunum	0.957738
		cecum	0.563432
	jejunum	feces	0.858669
		ileum	0.664628
		colon	0.957738
		cecum	0.649293
	cecum	feces	0.440589
		ileum	0.963426
		colon	0.563432
		jejunum	0.649293
Lewinella	feces	ileum	0.254854
		colon	0.0480014
		jejunum	0.0659223
		cecum	0.0103248
	ileum	feces	0.254854
		colon	0.743234
		jejunum	0.780537
		cecum	0.423985
	colon	feces	0.0480014
		ileum	0.743234
		jejunum	0.968061
		cecum	0.682667
	jejunum	feces	0.0659223
		ileum	0.780537
		colon	0.968061
		cecum	0.661683
	cecum	feces	0.0103248
		ileum	0.423985
		colon	0.682667
		jejunum	0.661683
Listeria	feces	ileum	0.087497
		colon	0.290707
		jejunum	0.0209075
		cecum	0.0464556
	ileum	feces	0.087497
		colon	0.540479
		jejunum	0.846539
		cecum	0.982255
	colon	feces	0.290707
		ileum	0.540479
		jejunum	0.274783
		cecum	0.478994
	jejunum	feces	0.0209075
		ileum	0.846539
		colon	0.274783
		cecum	0.798884
	cecum	feces	0.0464556
		ileum	0.982255
		colon	0.478994
		jejunum	0.798884
Lutispora	feces	ileum	0.754437
		colon	0.814974
		jejunum	0.0781236
		cecum	0.499538
	ileum	feces	0.754437
		colon	0.926936
		jejunum	0.318761
		cecum	0.869417
	colon	feces	0.814974
		ileum	0.926936
		jejunum	0.165524
		cecum	0.741384
	jejunum	feces	0.0781236
		ileum	0.318761
		colon	0.165524
		cecum	0.384316
	cecum	feces	0.499538
		ileum	0.869417
		colon	0.741384
		jejunum	0.384316
Macrococcus	feces	ileum	0.00142518
		colon	0.0196383
		jejunum	0.00556189
		cecum	0.0823633
	ileum	feces	0.00142518
		colon	0.246252
		jejunum	0.540479
		cecum	0.088604
	colon	feces	0.0196383
		ileum	0.246252
		jejunum	0.694249
		cecum	0.677846
	jejunum	feces	0.00556189
		ileum	0.540479
		colon	0.694249
		cecum	0.335722
	cecum	feces	0.0823633
		ileum	0.088604
		colon	0.677846
		jejunum	0.335722
Marinobacter	feces	ileum	0.207425
		colon	0.476058
		jejunum	0.661683
		cecum	0.186422
	ileum	feces	0.207425
		colon	0.0392441
		jejunum	0.509828
		cecum	0.924684
	colon	feces	0.476058
		ileum	0.0392441
		jejunum	0.184879
		cecum	0.0239194
	jejunum	feces	0.661683
		ileum	0.509828
		colon	0.184879
		cecum	0.536704
	cecum	feces	0.186422
		ileum	0.924684
		colon	0.0239194
		jejunum	0.536704
Marivita	feces	ileum	0.398292
		colon	0.0460336
		jejunum	0.123716
		cecum	0.0273825
	ileum	feces	0.398292
		colon	0.555957
		jejunum	0.773417
		cecum	0.45182
	colon	feces	0.0460336
		ileum	0.555957
		jejunum	0.819703
		cecum	0.904601
	jejunum	feces	0.123716
		ileum	0.773417
		colon	0.819703
		cecum	0.70449
	cecum	feces	0.0273825
		ileum	0.45182
		colon	0.904601
		jejunum	0.70449
Massilia	feces	ileum	0.44871
		colon	0.491994
		jejunum	0.968061
		cecum	0.220987
	ileum	feces	0.44871
		colon	0.904601
		jejunum	0.491896
		cecum	0.88684
	colon	feces	0.491994
		ileum	0.904601
		jejunum	0.54375
		cecum	0.730592
	jejunum	feces	0.968061
		ileum	0.491896
		colon	0.54375
		cecum	0.265654
	cecum	feces	0.220987
		ileum	0.88684
		colon	0.730592
		jejunum	0.265654
Megasphaera	feces	ileum	0.196106
		colon	0.886889
		jejunum	0.483755
		cecum	0.756888
	ileum	feces	0.196106
		colon	0.27661
		jejunum	0.642797
		cecum	0.0863653
	colon	feces	0.886889
		ileum	0.27661
		jejunum	0.627942
		cecum	0.605192
	jejunum	feces	0.483755
		ileum	0.642797
		colon	0.627942
		cecum	0.243344
	cecum	feces	0.756888
		ileum	0.0863653
		colon	0.605192
		jejunum	0.243344
Methanobrevibacter	feces	ileum	0.0745261
		colon	0.20909
		jejunum	0.0662165
		cecum	0.00836767
	ileum	feces	0.0745261
		colon	0.596734
		jejunum	0.919394
		cecum	0.763426
	colon	feces	0.20909
		ileum	0.596734
		jejunum	0.66981
		cecum	0.229637
	jejunum	feces	0.0662165
		ileum	0.919394
		colon	0.66981
		cecum	0.601228
	cecum	feces	0.00836767
		ileum	0.763426
		colon	0.229637
		jejunum	0.601228
Methanosaeta	feces	ileum	0.682721
		colon	0.729124
		jejunum	0.192254
		cecum	0.913716
	ileum	feces	0.682721
		colon	0.40411
		jejunum	0.61084
		cecum	0.573311
	colon	feces	0.729124
		ileum	0.40411
		jejunum	0.0682481
		cecum	0.835159
	jejunum	feces	0.192254
		ileum	0.61084
		colon	0.0682481
		cecum	0.134782
	cecum	feces	0.913716
		ileum	0.573311
		colon	0.835159
		jejunum	0.134782
Methanosphaera	feces	ileum	0.204086
		colon	0.244093
		jejunum	0.213538
		cecum	0.0345473
	ileum	feces	0.204086
		colon	0.857025
		jejunum	0.915156
		cecum	0.749063
	colon	feces	0.244093
		ileum	0.857025
		jejunum	0.942555
		cecum	0.470822
	jejunum	feces	0.213538
		ileum	0.915156
		colon	0.942555
		cecum	0.570729
	cecum	feces	0.0345473
		ileum	0.749063
		colon	0.470822
		jejunum	0.570729
Methylobacterium	feces	ileum	0.829566
		colon	0.0919216
		jejunum	0.270143
		cecum	0.0481226
	ileum	feces	0.829566
		colon	0.301697
		jejunum	0.561095
		cecum	0.195584
	colon	feces	0.0919216
		ileum	0.301697
		jejunum	0.753992
		cecum	0.858439
	jejunum	feces	0.270143
		ileum	0.561095
		colon	0.753992
		cecum	0.56856
	cecum	feces	0.0481226
		ileum	0.195584
		colon	0.858439
		jejunum	0.56856
Methylocystis	feces	ileum	0.376638
		colon	0.0600306
		jejunum	0.24785
		cecum	0.00972012
	ileum	feces	0.376638
		colon	0.646895
		jejunum	0.958227
		cecum	0.278134
	colon	feces	0.0600306
		ileum	0.646895
		jejunum	0.664628
		cecum	0.595714
	jejunum	feces	0.24785
		ileum	0.958227
		colon	0.664628
		cecum	0.258205
	cecum	feces	0.00972012
		ileum	0.278134
		colon	0.595714
		jejunum	0.258205
Micrococcus	feces	ileum	0.953326
		colon	0.430221
		jejunum	0.78054
		cecum	0.815995
	ileum	feces	0.953326
		colon	0.450976
		jejunum	0.75314
		cecum	0.785622
	colon	feces	0.430221
		ileum	0.450976
		jejunum	0.728758
		cecum	0.664302
	jejunum	feces	0.78054
		ileum	0.75314
		colon	0.728758
		cecum	0.963426
	cecum	feces	0.815995
		ileum	0.785622
		colon	0.664302
		jejunum	0.963426
Mitsuokella	feces	ileum	0.0261464
		colon	0.920701
		jejunum	0.0181965
		cecum	0.780537
	ileum	feces	0.0261464
		colon	0.0378181
		jejunum	0.940316
		cecum	0.0651432
	colon	feces	0.920701
		ileum	0.0378181
		jejunum	0.0269686
		cecum	0.869626
	jejunum	feces	0.0181965
		ileum	0.940316
		colon	0.0269686
		cecum	0.0512886
	cecum	feces	0.780537
		ileum	0.0651432
[truncated: 1,442 more rows]
